# Supplementary material for: A data-driven estimation of the ribosome drop-off rate in S. cerevisiae reveals a correlation with the genes length
Source: PubMed Central journal article supplement (PMC11025885; doi:10.1093/nargab/lqae036), 2024-04-18
Supplement: lqae036_supplemental_file.pdf [file lqae036_supplemental_file.pdf]

# Supplementary materials

## A data-driven estimation of the ribosome drop-off rate in *S. cerevisiae* reveals a correlation with the genes length.

Sherine Awad, Angelo Valleriani, Davide Chiarugi

## S1.A COMPUTING THE AVERAGE NUMBER OF RPFs PER ORF: A BINNING STRATEGY

Here, we explain the core of ‘ribofilio’. For each dataset reported in Table 1, we created a nucleotides vector positions as follows. For any gene  $g$ , let  $\ell(g)$  be the length of the ORF in nucleotides. We first create a vector of the length equal to the longest ORF, in nucleotides. At each position  $i$  of this vector, we count how many ORF have a length larger or equal to  $i$ . This gives the vector

$$GeneCoverage_i = \sum_g \text{bool}(\ell(g) \geq i) \quad (1)$$

where the sum runs over all genes and the function bool is defined as

$$\text{bool}(x) = \begin{cases} 1 & \text{if } x = \text{True} \\ 0 & \text{if } x = \text{False}. \end{cases} \quad (2)$$

As a next step, we build a vector that contains information about the 3’ position of all reads collected in the sample. Let  $r$  be any read in the sample, then the function  $t(r)$  gives the position  $i$  on the corresponding ORF of the 3’ end of the read  $r$ . In analogy to what done above we build now a vector of the same length as the longest ORF. This vector contains in each element  $i$  the number of reads in the entire sample whose 3’ end falls exactly on  $i$ . This could be formally defined as

$$nucleotidesMatrix_i = \sum_r \text{bool}(t(r) = i) \quad (3)$$

where the sum runs over all ribo-Seq reads of the sample. Finally, the quantity of interest is the vector

$$positions_i = \frac{nucleotidesMatrix_i}{GeneCoverage_i}. \quad (4)$$

To start binning, we group all normalised positions into bins of size bin-size. We use bins of size  $l$  to sum up the elements of the vector  $positions_i$  into our BIN vector. This results in the BIN vector as in equation 5):

$$BIN_{(j)} = \frac{1}{l} \sum_{i=1+l(j-1)}^{jl} positions_i \quad (5)$$

where  $l$  is the bin-size. We use the RPF reads to generate the BIN vector using equation 5 and similarly use their corresponding mRNA reads to generate the BIN vector. To normalize the amount of RPFs with the abundance of the corresponding mRNA reads, we divided the value in each cell of the footprints BIN vector by their corresponding cell of mRNA BIN as in equation 6

$$Y_{(i)} = \frac{\text{Footprints } Bin_i}{\text{mRNA } Bin_i} \quad (6)$$

Where  $Y$  is the normalised RPF vector that we fit in Eq. (1) of the main text.

A weighted linear regression is then performed where we regress over the BIN vector and the weight is basically the gene coverage per bin, i.e how many genes could possibly cover a given bin according to the gene’s length.

So basically, the gene coverage at a position is actually how many genes can cover this position based on the gene length. Once we count how many ribosomes reads cover each position from ribo-seq reads, we normalise this ribosomes reads count with the gene coverage at each position. Then we sums up the ribosomes reads normalised counts in each bin. A weighted linear regression is performed where the weight is the gene coverage per bin. i.e how many genes can cover this bin based on the genes

length. This way the variability of the coding sequence is considered in normalising the ribosomes reads counts and weights of regression are assigned accordingly.

## **S1.B TEST COVERAGE**

Test coverage is defined as a metric in Software Testing that measures the amount of testing performed by a set of tests. It will include gathering information about which parts of a program are executed when running the test suite to determine which branches of conditional statements have been taken. Test coverage should be 70% or more for a good tested software module (4)

## S2. SUPPLEMENTARY TABLES

**Table S1.** Primary alignments percentages for each dataset. See main text Table 1 for the respective GEO coordinates

| <b>Dataset</b> | <b>FP %</b> | <b>mRNA %</b> |
|----------------|-------------|---------------|
| D1             | 32.98       | 41.07         |
| D2             | 43.90       | 39.53         |
| D3             | 28.63       | 39.52         |
| D4             | 42.16       | 41.09         |
| D5             | 73.79       | 47.00         |
| D6             | 40.83       | 46.22         |
| D7             | 64.40       | 41.50         |
| D8             | 48.79       | 32.45         |

**Table S2.** Adapters trimmed used for each dataset as confirmed by authors. See main text Table 1 for the respective GEO coordinates

| Adapter           | Datasets       |
|-------------------|----------------|
| CTGTAGGCACCATCAAT | D1, D2, D3, D4 |
| PolyA             | D5, D6, D7, D8 |

**Table S3.** Gene Ontology Description. Column 1 is Gene Ontology ID. Column 2 is Gene Ontology Description. Column 3 is set size.

| Gene Ontology ID | Gene Ontology Description                                 | Set Size |
|------------------|-----------------------------------------------------------|----------|
| GO:0000462       | Maturation of SSU-rRNA from tricistronic rRNA transcript  | 70       |
| GO:0000466       | Maturation of 5.8S rRNA from tricistronic rRNA transcript | 15       |
| GO:0002181       | Cytoplasmic Translation                                   | 151      |
| GO:0003723       | RNA binding                                               | 315      |
| GO:0005840       | Ribosome                                                  | 171      |
| GO:0006364       | rRNA processing                                           | 111      |
| GO:0006396       | RNA processing                                            | 31       |
| GO:0006406       | mRNA Export from Nucleus                                  | 36       |
| GO:0006412       | Translation                                               | 186      |
| GO:0006950       | Response to Stress                                        | 33       |
| GO:0007049       | Cell Cycle                                                | 91       |
| GO:0009651       | Response to Salt Stress                                   | 20       |
| GO:0015934       | Large Ribosomal Subunit                                   | 18       |
| GO:0016458       | Gene Silencing                                            | 2        |
| GO:0022625       | Cytosolic Large Ribosomal Subunit                         | 83       |
| GO:0022626       | Cytosolic Ribosome                                        | 12       |
| GO:0022627       | Cytosolic Small Ribosomal Subunit                         | 66       |
| GO:0022857       | Transmembrane Transporter Activity                        | 111      |
| GO:0030490       | Maturation of SSU-rRNA                                    | 15       |
| GO:0030687       | Preribosome, Large Subunit Precursor                      | 52       |
| GO:0042254       | Ribosome Biogenesis                                       | 64       |
| GO:0042274       | Ribosomal Small Subunit Biogenesis                        | 30       |
| GO:0042255       | Ribosome Assembly                                         | 4        |
| GO:0003735       | Structural Constituent of Ribosome                        | 220      |
| GO:0003743       | Translation Initiation Factor activity                    | 37       |
| GO:0030684       | Preribosome                                               | 2        |
| GO:0044249       | Cellular biosynthetic process                             | 6        |
| GO:0006457       | Protein folding                                           | 85       |
| GO:0030686       | 90S Preribosome                                           | 22       |
| GO:0008135       | Translation factor activity, RNA binding                  | 1        |
| GO:0030529       | Intracellular Ribonucleoprotein complex                   | 6        |
| GO:0015935       | Small Ribosomal subunit                                   | 18       |

**Table S4.** Drop-off rate per codon for dataset D1 per GO subsets: Column 1: Gene Ontology ID (see Supplementary Table 1 for the respective GO IDs). Column 2: Drop-off rate ( $r_b$ ). Column 3: Drop-off rate per codon ( $r_c$ ). Column 4: *RMSE*. Column 5: coefficient of determination ( $R^2$ ). Column 6: Standard Error Estimate (SE). Column 7: Confidence Interval 95%. Column 8: p-value resulting from the t-test (null hypothesis:  $r_b = 0$ ) performed according to Equation 6.

| D1         |                    |                             |        |        |        |                  |          |
|------------|--------------------|-----------------------------|--------|--------|--------|------------------|----------|
| GO         | Drop-off ( $r_b$ ) | Dropoff per codon ( $r_c$ ) | RMSE   | $R^2$  | SE     | CI               | Pvalue   |
| GO:0000462 | 0.0136             | 0.0008                      | 0.1568 | 0.301  | 0.0016 | $r_b \pm 0.0031$ | <0.00001 |
| GO:0000466 | 0.0114             | 0.0007                      | 0.447  | 0.137  | 0.0039 | $r_b \pm 0.0076$ | 0.0019   |
| GO:0002181 | 0.0139             | 0.0008                      | 0.4688 | 0.1139 | 0.0057 | $r_b \pm 0.0113$ | 0.0082   |
| GO:0003723 | 0.0142             | 0.0008                      | 0.1771 | 0.2837 | 0.0052 | $r_b \pm 0.0102$ | 0.0034   |
| GO:0005840 | 0.0023             | 0.0001                      | 0.1523 | 0.0037 | 0.0041 | $r_b \pm 0.0081$ | 0.2852   |
| GO:0006364 | 0.0033             | 0.0002                      | 0.426  | 0.051  | .0013  | $r_b \pm 0.0026$ | 0.0077   |
| GO:0006396 | 0.0025             | 0.0002                      | 0.2275 | 0.0137 | 0.0015 | $r_b \pm 0.0029$ | 0.0448   |
| GO:0006406 | 0.0153             | 0.0009                      | 0.2653 | 0.2429 | 0.0049 | $r_b \pm 0.0098$ | 0.0012   |
| GO:0006412 | 0.029              | 0.0017                      | 0.4762 | 0.2228 | 0.01   | $r_b \pm 0.0198$ | 0.0023   |
| GO:0007049 | 0.0193             | 0.0011                      | 0.2507 | 0.378  | 0.0046 | $r_b \pm 0.0092$ | <0.00001 |
| GO:0009651 | 0.0191             | 0.0011                      | 0.1238 | 0.4797 | 0.0026 | $r_b \pm 0.0052$ | <0.00001 |
| GO:0015934 | 0.04               | 0.0024                      | 3.1911 | 0.238  | 0.0115 | $r_b \pm 0.0228$ | 0.0004   |
| GO:0016458 | 0.0352             | 0.0021                      | 1.4971 | 0.3414 | 0.0056 | $r_b \pm 0.0111$ | <0.00001 |
| GO:0022625 | 0.0359             | 0.0021                      | 0.0879 | 0.3203 | 0.0059 | $r_b \pm 0.012$  | <0.00001 |
| GO:0022626 | 0.0077             | 0.0005                      | 0.1348 | 0.4062 | 0.0008 | $r_b \pm 0.0016$ | <0.00001 |
| GO:0022627 | 0.0021             | 0.0001                      | 0.1957 | 0.0026 | 0.0038 | $r_b \pm 0.0075$ | 0.2915   |
| GO:0030490 | 0.0031             | 0.0002                      | 0.2414 | 0.0223 | 0.002  | $r_b \pm 0.0041$ | 0.0671   |
| GO:0030687 | 0.0327             | 0.0019                      | 0.1473 | 0.5615 | 0.0032 | $r_b \pm 0.0064$ | <0.00001 |
| GO:0042254 | 0.0122             | 0.0007                      | 0.3784 | 0.2818 | 0.0025 | $r_b \pm 0.005$  | <0.00001 |
| GO:0042274 | 0.014              | 0.0008                      | 0.2632 | 0.187  | 0.0065 | $r_b \pm 0.013$  | 0.0171   |
| GO:0042255 | 0.0048             | 0.0003                      | 0.2121 | 0.0371 | 0.0031 | $r_b \pm 0.0062$ | 0.0638   |
| GO:0003735 | 0.0465             | 0.0027                      | 0.1409 | 0.3187 | 0.03   | $r_b \pm 0.0609$ | 0.0653   |
| GO:0003743 | 0.0079             | 0.0005                      | 0.0632 | 0.1874 | 0.0018 | $r_b \pm 0.0036$ | <0.00001 |
| GO:0006457 | 0.0143             | 0.0008                      | 0.0765 | 0.2795 | 0.0035 | $r_b \pm 0.007$  | 0.0001   |
| GO:0008135 | 0.0728             | 0.0042                      | 0.6495 | 0.2302 | 0.0305 | $r_b \pm 0.0639$ | 0.0139   |
| GO:0030529 | 0.0501             | 0.0029                      | 1.0464 | 0.1873 | 0.0277 | $r_b \pm 0.0561$ | 0.0394   |
| GO:0030684 | 0.0406             | 0.0024                      | 0.0796 | 0.5521 | 0.0068 | $r_b \pm 0.0141$ | <0.00001 |
| GO:0044249 | 0.0481             | 0.0028                      | 0.0946 | 0.5671 | 0.0093 | $r_b \pm 0.019$  | <0.00001 |
| GO:0030686 | 0.0152             | 0.0009                      | 0.4494 | 0.3564 | 0.0022 | $r_b \pm 0.0043$ | <0.00001 |
| GO:0015935 | 0.0391             | 0.0023                      | 3.4594 | 0.2245 | 0.0116 | $r_b \pm 0.023$  | 0.0005   |

**Table S5.** Drop-off rate per codon for dataset D2 per GO subsets: Column 1: Gene Ontology ID (see Supplementary Table 1 for the respective GO IDs). Column 2: Drop-off rate ( $r_b$ ). Column 3: Drop-off rate per codon ( $r_c$ ). Column 4: *RMSE*. Column 5: coefficient of determination ( $R^2$ ). Column 6: Standard Error Estimate (SE). Column 7: Confidence Interval 95%. Column 8: p-value resulting from the t-test (null hypothesis:  $r_b = 0$ ) performed according to Equation 6.

| D2         |                    |                             |        |         |        |                  |          |
|------------|--------------------|-----------------------------|--------|---------|--------|------------------|----------|
| GO         | Drop-off ( $r_b$ ) | Dropoff per codon ( $r_c$ ) | RMSE   | $R^2$ . | SE     | CI               | Pvalue   |
| GO:0000462 | 0.0236             | 0.0014                      | 0.1954 | 0.5088  | 0.0017 | $r_b \pm 0.0033$ | <0.00001 |
| GO:0000466 | 0.0216             | 0.0013                      | 0.2354 | 0.5198  | 0.0018 | $r_b \pm 0.0035$ | <0.00001 |
| GO:0002181 | 0.028              | 0.0017                      | 0.3795 | 0.3932  | 0.0047 | $r_b \pm 0.0094$ | <0.00001 |
| GO:0003723 | 0.0226             | 0.0013                      | 0.1816 | 0.4957  | 0.004  | $r_b \pm 0.0079$ | <0.00001 |
| GO:0005840 | 0.011              | 0.0007                      | 0.2144 | 0.0556  | 0.0038 | $r_b \pm 0.0077$ | 0.0028   |
| GO:0006364 | 0.0052             | 0.0003                      | 0.308  | 0.1571  | 0.0009 | $r_b \pm 0.0017$ | <0.00001 |
| GO:0006396 | 0.0056             | 0.0003                      | 0.3948 | 0.0379  | 0.0021 | $r_b \pm 0.0042$ | 0.0046   |
| GO:0006406 | 0.0306             | 0.0018                      | 0.0737 | 0.822   | 0.0024 | $r_b \pm 0.0047$ | <0.00001 |
| GO:0006412 | 0.0351             | 0.0021                      | 0.3148 | 0.3879  | 0.006  | $r_b \pm 0.0119$ | <0.00001 |
| GO:0007049 | 0.0289             | 0.0017                      | 0.2014 | 0.6291  | 0.0022 | $r_b \pm 0.0044$ | <0.00001 |
| GO:0015934 | 0.0348             | 0.0021                      | 1.0647 | 0.4149  | 0.006  | $r_b \pm 0.0119$ | <0.00001 |
| GO:0016458 | 0.0434             | 0.0026                      | 1.0898 | 0.5196  | 0.005  | $r_b \pm 0.0099$ | <0.00001 |
| GO:0022625 | 0.0702             | 0.0041                      | 0.1393 | 0.5316  | 0.0086 | $r_b \pm 0.0175$ | <0.00001 |
| GO:0022626 | 0.0102             | 0.0006                      | 0.2022 | 0.4473  | 0.0009 | $r_b \pm 0.0018$ | <0.00001 |
| GO:0022627 | 0.015              | 0.0009                      | 0.2709 | 0.0887  | 0.0047 | $r_b \pm 0.0094$ | 0.0011   |
| GO:0030490 | 0.0014             | 0.0001                      | 0.2782 | 0.004   | 0.0022 | $r_b \pm 0.0044$ | 0.2663   |
| GO:0030687 | 0.0345             | 0.002                       | 0.1269 | 0.6235  | 0.0024 | $r_b \pm 0.0048$ | <0.00001 |
| GO:0042254 | 0.0163             | 0.001                       | 0.185  | 0.5863  | 0.001  | $r_b \pm 0.002$  | <0.00001 |
| GO:0042274 | 0.0215             | 0.0013                      | 0.1411 | 0.5017  | 0.0023 | $r_b \pm 0.0045$ | <0.00001 |
| GO:0042255 | 0.0008             | 0.0                         | 0.3551 | 0.0006  | 0.0044 | $r_b \pm 0.0088$ | 0.4283   |
| GO:0003735 | 0.0807             | 0.0047                      | 0.1117 | 0.6404  | 0.0074 | $r_b \pm 0.015$  | <0.00001 |
| GO:0003743 | 0.023              | 0.0014                      | 0.0908 | 0.5782  | 0.002  | $r_b \pm 0.004$  | <0.00001 |
| GO:0006457 | 0.0298             | 0.0018                      | 0.1517 | 0.46    | 0.0088 | $r_b \pm 0.0176$ | 0.0006   |
| GO:0008135 | 0.0985             | 0.0057                      | 0.7906 | 0.3105  | 0.0337 | $r_b \pm 0.0705$ | 0.0043   |
| GO:0030529 | 0.0806             | 0.0047                      | 1.0568 | 0.3713  | 0.0282 | $r_b \pm 0.0572$ | 0.0035   |
| GO:0030686 | 0.0131             | 0.0008                      | 0.2096 | 0.4696  | 0.001  | $r_b \pm 0.0021$ | <0.00001 |
| GO:0015935 | 0.0355             | 0.0021                      | 1.0798 | 0.4343  | 0.006  | $r_b \pm 0.012$  | <0.00001 |

**Table S6.** Drop-off rate per codon for dataset D1 and D2 per GO subsets. bin-size equals 50. Column 1: GO ID (Table 1 in section S2 for the respective GO names). Column 2: Set Size. Column 3: Description. Column 4: Drop-off rate ( $r_b$ ). Column 5: Drop-off rate per codon ( $r_c$ ). Column 6: *RMSE*. Column 7: coefficient of determination ( $R^2$ ). Column 8: Standard Error Estimate (SE). Column 9: Confidence Interval 95%. Column 10: p-value resulting from the t-test (null hypothesis:  $r_b = 0$ ) performed according to Equation 6. The response to stress GO (GO:0006950) and The Transmembrane Transporter Activity GO (GO:0006950) are commonly significant among the control datasets D1, and D2, both have p-value <0.01. Their set size is 33 and 111 respectively, and they are significantly different when compared to control datasets D1 and D2. See table S9 and S10.

| D1                |      |                                    |                    |                              |        |        |        |                  |          |
|-------------------|------|------------------------------------|--------------------|------------------------------|--------|--------|--------|------------------|----------|
| GO                | Size | Description                        | Drop-off ( $r_b$ ) | drop-off per codon ( $r_c$ ) | RMSE   | $R^2$  | SE     | CI               | p-value  |
| <b>GO:0006950</b> | 33   | Response to Stress                 | 0.2064             | 0.0113                       | 3.2499 | 0.7287 | 0.021  | $r_b \pm 0.0418$ | <0.00001 |
| <b>GO:0022857</b> | 111  | Transmembrane Transporter Activity | 0.04               | 0.0024                       | 0.0601 | 0.7682 | 0.0042 | $r_b \pm 0.0084$ | <0.00001 |
| D2                |      |                                    |                    |                              |        |        |        |                  |          |
| GO                | Size | Description                        | Drop-off ( $r_b$ ) | drop-off per codon ( $r_c$ ) | RMSE   | $R^2$  | SE     | CI               | p-value  |
| <b>GO:0006950</b> | 33   | Response to Stress                 | 0.2166             | 0.0118                       | 4.4808 | 0.6821 | 0.0241 | $r_b \pm 0.0482$ | <0.00001 |
| <b>GO:0022857</b> | 111  | Transmembrane Transporter Activity | 0.0568             | 0.0033                       | 0.0888 | 0.8188 | 0.009  | $r_b \pm 0.018$  | <0.00001 |
| GO:0030684        | 2    | Preribosome                        | 0.0594             | 0.0035                       | 0.0909 | 0.6985 | 0.0078 | $r_b \pm 0.016$  | <0.00001 |
| GO:0044249        | 6    | Cellular biosynthetic process      | 0.0747             | 0.0043                       | 0.0864 | 0.7758 | 0.008  | $r_b \pm 0.0164$ | <0.00001 |
| GO:0009651        | 20   | Response to Salt Stress            | 0.0467             | 0.0027                       | 0.2279 | 0.7495 | 0.0035 | $r_b \pm 0.0069$ | <0.00001 |

**Table S7.** Drop-off rate for treatment dataset D3, and D4 per Gene Length subset: Column 1: Gene Length subset. Column 2: Drop-off rate ( $r_b$ ). Column 3: Drop-off rate per codon ( $r_c$ ). Column 4: *RMSE*. Column 5: coefficient of determination ( $R^2$ ). Column 6: Standard Error Estimate (SE). Column 7: Confidence Interval 95%. Column 8: p-value resulting from the t-test (null hypothesis:  $r_b = 0$ ) performed according to Equation 6.

| D3          |                    |                              |        |        |        |                  |          |
|-------------|--------------------|------------------------------|--------|--------|--------|------------------|----------|
| Gene Length | Drop-off ( $r_b$ ) | drop-off per codon ( $r_c$ ) | RMSE   | $R^2$  | SE     | CI               | Pvalue   |
| <500        | -0.0603            | -0.0035                      | 0.0827 | 0.2052 | 0.0366 | $r_b \pm 0.0843$ | 0.069    |
| ]500-1000]  | 0.1074             | 0.0061                       | 0.1829 | 0.6011 | 0.019  | $r_b \pm 0.04$   | <0.00001 |
| ]1000-2000] | 0.0596             | 0.0035                       | 0.1475 | 0.6772 | 0.0055 | $r_b \pm 0.0111$ | <0.00001 |
| ]2000-3000] | 0.0399             | 0.0023                       | 0.1444 | 0.7009 | 0.0028 | $r_b \pm 0.0056$ | <0.00001 |
| ]3000-4000] | 0.0341             | 0.002                        | 0.109  | 0.8121 | 0.0017 | $r_b \pm 0.0033$ | <0.00001 |
| ]4000-5000] | 0.0258             | 0.0015                       | 0.1255 | 0.7834 | 0.0012 | $r_b \pm 0.0024$ | <0.00001 |
| >5000       | 0.0105             | 0.0006                       | 0.1508 | 0.6228 | 0.0008 | $r_b \pm 0.0015$ | <0.00001 |
| D4          |                    |                              |        |        |        |                  |          |
| Gene Length | Drop-off ( $r_b$ ) | drop-off per codon ( $r_c$ ) | RMSE   | $R^2$  | SE     | CI               | Pvalue   |
| <500        | -0.009             | -0.0005                      | 0.0652 | 0.0073 | 0.0292 | $r_b \pm 0.0674$ | 0.3825   |
| ]500-1000]  | 0.0987             | 0.0057                       | 0.0501 | 0.823  | 0.0091 | $r_b \pm 0.0192$ | <0.00001 |
| ]1000-2000] | 0.0494             | 0.0029                       | 0.06   | 0.7799 | 0.0039 | $r_b \pm 0.0079$ | <0.00001 |
| ]2000-3000] | 0.0359             | 0.0021                       | 0.0503 | 0.8454 | 0.0016 | $r_b \pm 0.0032$ | <0.00001 |
| ]3000-4000] | 0.0291             | 0.0017                       | 0.0429 | 0.8885 | 0.001  | $r_b \pm 0.002$  | <0.00001 |
| ]4000-5000] | 0.0234             | 0.0014                       | 0.0534 | 0.8748 | 0.0009 | $r_b \pm 0.0017$ | <0.00001 |
| >5000       | 0.0131             | 0.0008                       | 0.0573 | 0.8705 | 0.0004 | $r_b \pm 0.0008$ | <0.00001 |



**Table S8.** Drop-off rate for rich and starved datasets D5, D6, D7, and D8 per Gene Length subset: Column 1: Gene Length subset. Column 2: Drop-off rate ( $r_b$ ). Column 3: Drop-off rate per codon ( $r_c$ ). Column 4:  $RMSE$ . Column 5: coefficient of determination ( $R^2$ ). Column 6: Standard Error Estimate (SE). Column 7: Confidence Interval 95%. Column 8: p-value resulting from the t-test (null hypothesis:  $r_b = 0$ ) performed according to Equation 6.

| D5          |                    |                              |        |        |        |                  |          |
|-------------|--------------------|------------------------------|--------|--------|--------|------------------|----------|
| Gene Length | Drop-off ( $r_b$ ) | drop-off per codon ( $r_c$ ) | RMSE   | $R^2$  | SE     | CI               | Pvalue   |
| <500        | -0.1931            | -0.0107                      | 1.9229 | 0.1024 | 0.1462 | $r_b \pm 0.3371$ | 0.1115   |
| ]500-1000]  | 0.0626             | 0.0036                       | 0.0167 | 0.8488 | 0.0085 | $r_b \pm 0.0179$ | <0.00001 |
| ]1000-2000] | 0.029              | 0.0017                       | 0.05   | 0.5943 | 0.0037 | $r_b \pm 0.0074$ | <0.00001 |
| ]2000-3000] | 0.0219             | 0.0013                       | 0.0389 | 0.7242 | 0.0016 | $r_b \pm 0.0031$ | <0.00001 |
| ]3000-4000] | 0.0211             | 0.0013                       | 0.0289 | 0.8612 | 0.0009 | $r_b \pm 0.0019$ | <0.00001 |
| ]4000-5000] | 0.0189             | 0.0011                       | 0.0412 | 0.8546 | 0.0008 | $r_b \pm 0.0016$ | <0.00001 |
| >5000       | 0.0094             | 0.0006                       | 0.5654 | 0.2604 | 0.0021 | $r_b \pm 0.0041$ | <0.00001 |
| D6          |                    |                              |        |        |        |                  |          |
| Gene Length | Drop-off ( $r_b$ ) | drop-off per codon ( $r_c$ ) | RMSE   | $R^2$  | SE     | CI               | Pvalue   |
| <500        | -0.117             | -0.0067                      | 1.4885 | 0.0513 | 0.1285 | $r_b \pm 0.2964$ | 0.1945   |
| ]500-1000]  | 0.055              | 0.0032                       | 0.0186 | 0.7953 | 0.0079 | $r_b \pm 0.0166$ | <0.00001 |
| ]1000-2000] | 0.0278             | 0.0016                       | 0.0478 | 0.5857 | 0.004  | $r_b \pm 0.0082$ | <0.00001 |
| ]2000-3000] | 0.0212             | 0.0013                       | 0.0349 | 0.734  | 0.0016 | $r_b \pm 0.0032$ | <0.00001 |
| ]3000-4000] | 0.0187             | 0.0011                       | 0.0456 | 0.7557 | 0.0012 | $r_b \pm 0.0024$ | <0.00001 |
| ]4000-5000] | 0.0199             | 0.0012                       | 0.0304 | 0.8985 | 0.0007 | $r_b \pm 0.0014$ | <0.00001 |
| >5000       | 0.0098             | 0.0006                       | 0.4446 | 0.328  | 0.0019 | $r_b \pm 0.0038$ | <0.00001 |
| D7          |                    |                              |        |        |        |                  |          |
| Gene Length | Drop-off ( $r_b$ ) | drop-off per codon ( $r_c$ ) | RMSE   | $R^2$  | SE     | CI               | Pvalue   |
| <500        | -0.1713            | -0.0095                      | 2.2961 | 0.0699 | 0.1592 | $r_b \pm 0.3672$ | 0.1568   |
| ]500-1000]  | 0.0729             | 0.0042                       | 0.0141 | 0.9004 | 0.0066 | $r_b \pm 0.014$  | <0.00001 |
| ]1000-2000] | 0.0301             | 0.0018                       | 0.0613 | 0.5638 | 0.0045 | $r_b \pm 0.0092$ | <0.00001 |
| ]2000-3000] | 0.0208             | 0.0012                       | 0.0575 | 0.6152 | 0.0018 | $r_b \pm 0.0036$ | <0.00001 |
| ]3000-4000] | 0.0212             | 0.0013                       | 0.0546 | 0.7683 | 0.0013 | $r_b \pm 0.0026$ | <0.00001 |
| ]4000-5000] | 0.0181             | 0.0011                       | 0.0828 | 0.7303 | 0.0011 | $r_b \pm 0.0022$ | <0.00001 |
| >5000       | 0.0119             | 0.0007                       | 1.0522 | 0.2324 | 0.0027 | $r_b \pm 0.0053$ | <0.00001 |
| D8          |                    |                              |        |        |        |                  |          |
| Gene Length | Drop-off ( $r_b$ ) | drop-off per codon ( $r_c$ ) | RMSE   | $R^2$  | SE     | CI               | Pvalue   |
| <500        | -0.1393            | -0.0079                      | 1.8788 | 0.0573 | 0.1451 | $r_b \pm 0.3347$ | 0.1826   |
| ]500-1000]  | 0.0752             | 0.0044                       | 0.04   | 0.7718 | 0.0092 | $r_b \pm 0.0194$ | <0.00001 |
| ]1000-2000] | 0.0295             | 0.0017                       | 0.0663 | 0.5337 | 0.0047 | $r_b \pm 0.0095$ | <0.00001 |
| ]2000-3000] | 0.0213             | 0.0013                       | 0.0676 | 0.5892 | 0.0019 | $r_b \pm 0.0039$ | <0.00001 |
| ]3000-4000] | 0.0195             | 0.0012                       | 0.0618 | 0.7129 | 0.0013 | $r_b \pm 0.0025$ | <0.00001 |
| ]4000-5000] | 0.0171             | 0.001                        | 0.0586 | 0.7727 | 0.001  | $r_b \pm 0.0019$ | <0.00001 |
| >5000       | 0.0107             | 0.0006                       | 0.7817 | 0.2473 | 0.0027 | $r_b \pm 0.0052$ | <0.00001 |

**Table S9.** Significant t-test comparison of dataset D1 drop-off rate vs its corresponding drop-off rate of GO subset: Column 1: Gene Ontology ID (see Supplementary Table 1 for the respective GO IDs). Column 2: Pvalue: Null Hypothesis drop-off rate is not different from the main Dataset

| GO               | Pvalue   |
|------------------|----------|
| D1 vs GO:0000462 | <0.00001 |
| D1 vs GO:0000466 | 0.0556   |
| D1 vs GO:0002181 | 0.0627   |
| D1 vs GO:0003723 | 0.0414   |
| D1 vs GO:0005840 | 0.0375   |
| D1 vs GO:0006364 | 0.1046   |
| D1 vs GO:0006396 | <0.00001 |
| D1 vs GO:0006406 | 0.0197   |
| D1 vs GO:0006412 | 0.0088   |
| D1 vs GO:0006950 | <0.00001 |
| D1 vs GO:0007049 | 0.0012   |
| D1 vs GO:0009651 | <0.00001 |
| D1 vs GO:0015934 | 0.0013   |
| D1 vs GO:0016458 | <0.00001 |
| D1 vs GO:0022625 | <0.00001 |
| D1 vs GO:0022626 | 0.0048   |
| D1 vs GO:0022627 | 0.031    |
| D1 vs GO:0022857 | <0.00001 |
| D1 vs GO:0030490 | 0.0001   |
| D1 vs GO:0030687 | <0.00001 |
| D1 vs GO:0042254 | 0.003    |
| D1 vs GO:0042274 | 0.0868   |
| D1 vs GO:0042255 | 0.4622   |
| D1 vs GO:0003735 | 0.0843   |
| D1 vs GO:0003743 | 0.0704   |
| D1 vs GO:0030684 | <0.00001 |
| D1 vs GO:0044249 | <0.00001 |
| D1 vs GO:0006457 | 0.005    |
| D1 vs GO:0030686 | <0.00001 |
| D1 vs GO:0008135 | 0.0136   |
| D1 vs GO:0030529 | 0.0526   |
| D1 vs GO:0015935 | 0.0018   |

**Table S10.** Significant t-test comparison of dataset D2 drop-off rate vs its corresponding drop-off rate of GO subset: Column 1: Gene Ontology ID (see Supplementary Table 1 for the respective GO IDs). Column 2: Pvalue: Null Hypothesis drop-off rate is not different from the main Dataset

| GO               | Pvalue   |
|------------------|----------|
| D2 vs GO:0000462 | <0.00001 |
| D2 vs GO:0000466 | <0.00001 |
| D2 vs GO:0002181 | 0.0001   |
| D2 vs GO:0003723 | 0.0012   |
| D2 vs GO:0005840 | 0.418    |
| D2 vs GO:0006364 | <0.00001 |
| D2 vs GO:0006396 | 0.0192   |
| D2 vs GO:0006406 | <0.00001 |
| D2 vs GO:0006412 | <0.00001 |
| D2 vs GO:0006950 | <0.00001 |
| D2 vs GO:0007049 | <0.00001 |
| D2 vs GO:0009651 | <0.00001 |
| D2 vs GO:0015934 | 0.0001   |
| D2 vs GO:0016458 | <0.00001 |
| D2 vs GO:0022625 | <0.00001 |
| D2 vs GO:0022626 | 0.5      |
| D2 vs GO:0022627 | 0.1566   |
| D2 vs GO:0022857 | <0.00001 |
| D2 vs GO:0030490 | <0.00001 |
| D2 vs GO:0030687 | <0.00001 |
| D2 vs GO:0042254 | <0.00001 |
| D2 vs GO:0042274 | <0.00001 |
| D2 vs GO:0042255 | 0.007    |
| D2 vs GO:0003735 | <0.00001 |
| D2 vs GO:0003743 | <0.00001 |
| D2 vs GO:0030684 | <0.00001 |
| D2 vs GO:0044249 | <0.00001 |
| D2 vs GO:0006457 | 0.0135   |
| D2 vs GO:0030686 | 0.009    |
| D2 vs GO:0008135 | 0.0046   |
| D2 vs GO:0030529 | 0.0065   |
| D2 vs GO:0015935 | <0.00001 |

**Table S11.** Significant t-test comparison of the drop-off rate of each dataset (D1, and D2) vs the drop-off rate of the corresponding gene length subset of the dataset. Column 1: Gene Length subset. Column 2: Pvalue: Null Hypothesis that the drop-off rate is not different from the main Dataset

| D1                |          |
|-------------------|----------|
| Gene Length       | Pvalue   |
| D1 vs ]0-500]     | 0.1843   |
| D1 vs ]500-1000]  | <0.00001 |
| D1 vs ]1000-2000] | <0.00001 |
| D1 vs ]2000-3000] | <0.00001 |
| D1 vs ]3000-4000] | <0.00001 |
| D1 vs ]4000-5000] | <0.00001 |
| D1 vs > 5000      | <0.00001 |
| D2                |          |
| Gene Length       | Pvalue   |
| D2 vs ]0-500]     | 0.2309   |
| D2 vs ]500-1000]  | <0.00001 |
| D2 vs ]1000-2000] | <0.00001 |
| D2 vs ]2000-3000] | <0.00001 |
| D2 vs ]3000-4000] | <0.00001 |
| D2 vs ]4000-5000] | <0.00001 |
| D2 vs > 5000      | <0.00001 |

**Table S12.** Significant t-test comparison of the drop-off rate of each dataset (D3, and D4) vs the drop-off rate of the corresponding gene length subset of the dataset. Column 1: Gene Length subset. Column 2: Pvalue: Null Hypothesis that the drop-off rate is not different from the main Dataset

| D3                |          |
|-------------------|----------|
| Gene Length       | Pvalue   |
| D3 vs ]0-500]     | 0.0853   |
| D3 vs ]500-1000]  | <0.00001 |
| D3 vs ]1000-2000] | <0.00001 |
| D3 vs ]2000-3000] | <0.00001 |
| D3 vs ]3000-4000] | <0.00001 |
| D3 vs ]4000-5000] | <0.00001 |
| D3 vs > 5000      | 0.3566   |
| D4                |          |
| Gene Length       | Pvalue   |
| D4 vs ]0-500]     | 0.4768   |
| D4 vs ]500-1000]  | <0.00001 |
| D4 vs ]1000-2000] | <0.00001 |
| D4 vs ]2000-3000] | <0.00001 |
| D4 vs ]3000-4000] | <0.00001 |
| D4 vs ]4000-5000] | <0.00001 |
| D4 vs > 5000      | <0.00001 |

**Table S13.** Significant t-test comparison of the drop-off rate of each dataset (D5, D6, D7, and D8) vs the drop-off rate of the corresponding gene length subset of the dataset. Column 1: Gene Length subset. Column 2: Pvalue: Null Hypothesis that the drop-off rate is not different from the main Dataset

| D5                |          |
|-------------------|----------|
| Gene Length       | Pvalue   |
| D5 vs ]0-500]     | 0.1005   |
| D5 vs ]500-1000]  | <0.00001 |
| D5 vs ]1000-2000] | <0.00001 |
| D5 vs ]2000-3000] | <0.00001 |
| D5 vs ]3000-4000] | <0.00001 |
| D5 vs ]4000-5000] | <0.00001 |
| D5 vs > 5000      | 0.1067   |
| D6                |          |
| Gene Length       | Pvalue   |
| D6 vs ]0-500]     | 0.1927   |
| D6 vs ]500-1000]  | <0.00001 |
| D6 vs ]1000-2000] | <0.00001 |
| D6 vs ]2000-3000] | <0.00001 |
| D6 vs ]3000-4000] | <0.00001 |
| D6 vs ]4000-5000] | <0.00001 |
| D6 vs > 5000      | 0.0473   |
| D7                |          |
| Gene Length       | Pvalue   |
| D7 vs ]0-500]     | 0.1528   |
| D7 vs ]500-1000]  | <0.00001 |
| D7 vs ]1000-2000] | <0.00001 |
| D7 vs ]2000-3000] | <0.00001 |
| D7 vs ]3000-4000] | <0.00001 |
| D7 vs ]4000-5000] | 0.0003   |
| D7 vs > 5000      | 0.1476   |
| D8                |          |
| Gene Length       | Pvalue   |
| D8 vs ]0-500]     | 0.1826   |
| D8 vs ]500-1000]  | <0.00001 |
| D8 vs ]1000-2000] | 0.0001   |
| D8 vs ]2000-3000] | <0.00001 |
| D8 vs ]3000-4000] | 0.0001   |
| D8 vs ]4000-5000] | 0.0006   |
| D8 vs > 5000      | 0.2162   |

**Table S14.** Drop-off rate for Datasets D1 to D8 using Binsize =100 and 25. Column 1: Datasets ID. Column 2: Drop-off rate per bin ( $r_b$ ). Column 3: Drop-off rate per codon ( $r_c$ ). Column 4: *RMSE*. Column 5: coefficient of determination ( $R^2$ ). Column 6: Standard Error Estimate (SE). Column 7: Confidence Interval 95%. Column 8: p-value resulting from the t-test (null hypothesis:  $r_b = 0$ ) performed according to Equation 6.

| Dataset      | Drop-off ( $r_b$ ) | Dropoff per codon ( $r_c$ ) | RMSE   | $R^2$  | SE     | CI               | Pvalue   |
|--------------|--------------------|-----------------------------|--------|--------|--------|------------------|----------|
| binsize =100 |                    |                             |        |        |        |                  |          |
| D1           | 0.0097             | 0.0003                      | 0.0084 | 0.5967 | 0.001  | $r_b \pm 0.002$  | <0.00001 |
| D2           | 0.02               | 0.0006                      | 0.0211 | 0.7159 | 0.0018 | $r_b \pm 0.0036$ | <0.00001 |
| D3           | 0.0192             | 0.0006                      | 0.0579 | 0.4588 | 0.0029 | $r_b \pm 0.0057$ | <0.00001 |
| D4           | 0.0138             | 0.0004                      | 0.0204 | 0.5539 | 0.0007 | $r_b \pm 0.0013$ | <0.00001 |
| D5           | 0.0203             | 0.0006                      | 0.6719 | 0.0756 | 0.0038 | $r_b \pm 0.0075$ | <0.00001 |
| D6           | 0.0169             | 0.0005                      | 0.3845 | 0.0905 | 0.0038 | $r_b \pm 0.0074$ | <0.00001 |
| D7           | 0.0235             | 0.0007                      | 0.7046 | 0.0949 | 0.0078 | $r_b \pm 0.0154$ | 0.0015   |
| D8           | 0.0217             | 0.0006                      | 0.5529 | 0.102  | 0.0055 | $r_b \pm 0.011$  | 0.0001   |
| binsize =25  |                    |                             |        |        |        |                  |          |
| Gene         | Drop-off ( $r_b$ ) | Dropoff per codon ( $r_c$ ) | RMSE   | $R^2$  | SE     | CI               | Pvalue   |
| D1           | 0.003              | 0.0004                      | 0.0751 | 0.2095 | 0.0004 | $r_b \pm 0.0008$ | <0.00001 |
| D2           | 0.0059             | 0.0007                      | 0.1277 | 0.3672 | 0.0003 | $r_b \pm 0.0006$ | <0.00001 |
| D3           | 0.0053             | 0.0006                      | 0.1773 | 0.2558 | 0.0005 | $r_b \pm 0.001$  | <0.00001 |
| D4           | 0.0044             | 0.0005                      | 0.1454 | 0.225  | 0.0002 | $r_b \pm 0.0004$ | <0.00001 |
| D5           | 0.0018             | 0.0002                      | 0.4023 | 0.0174 | 0.001  | $r_b \pm 0.002$  | 0.036    |
| D6           | 0.0023             | 0.0003                      | 0.2884 | 0.0372 | 0.001  | $r_b \pm 0.002$  | 0.0128   |
| D7           | 0.0032             | 0.0004                      | 0.4543 | 0.0461 | 0.0009 | $r_b \pm 0.0018$ | 0.0002   |
| D8           | 0.0034             | 0.0004                      | 0.3596 | 0.0633 | 0.001  | $r_b \pm 0.002$  | 0.0005   |

**Table S15.** Drop-off rate for control datasets D1, and D2 and separate genes as a special case: Column 1: Gene Name. Column 2: Drop-off rate per bin ( $r_b$ ). Column 3: Drop-off rate per codon ( $r_c$ ). Column 4: *RMSE*. Column 5: coefficient of determination ( $R^2$ ). Column 6: Standard Error Estimate (SE). Column 7: Confidence Interval 95%. Column 8: p-value resulting from the t-test (null hypothesis:  $r_b = 0$ ) performed according to Equation 6..

| D1   |                    |                             |         |        |        |                  |          |
|------|--------------------|-----------------------------|---------|--------|--------|------------------|----------|
| Gene | Drop-off ( $r_b$ ) | Dropoff per codon ( $r_c$ ) | RMSE    | $R^2$  | SE     | CI               | Pvalue   |
| MHS2 | 0.0326             | 0.0019                      | 0.2171  | 0.5778 | 0.0037 | $r_b \pm 0.0075$ | <0.00001 |
| MLH1 | 0.0668             | 0.0039                      | 19.7502 | 0.0399 | 0.0488 | $r_b \pm 0.0984$ | 0.0892   |
| D2   |                    |                             |         |        |        |                  |          |
| Gene | Drop-off ( $r_b$ ) | Dropoff per codon ( $r_c$ ) | RMSE    | $R^2$  | SE     | CI               | Pvalue   |
| MHS2 | 0.0498             | 0.0029                      | 0.1671  | 0.8061 | 0.0033 | $r_b \pm 0.0065$ | <0.00001 |
| MLH1 | 0.085              | 0.0049                      | 2.9649  | 0.3097 | 0.0189 | $r_b \pm 0.0381$ | <0.00001 |

**Table S16.** Drop-off rate for treatment datasets D3, and D4 and separate genes as a special case: Column 1: Gene Name. Column 2: Drop-off rate per bin ( $r_b$ ). Column 3: Drop-off rate per codon ( $r_c$ ). Column 4: *RMSE*. Column 5: coefficient of determination ( $R^2$ ). Column 6: Standard Error Estimate (SE). Column 7: Confidence Interval 95%. Column 8: p-value resulting from the t-test (null hypothesis:  $r_b = 0$ ) performed according to Equation 6.

| D3   |                    |                             |         |        |        |                  |          |
|------|--------------------|-----------------------------|---------|--------|--------|------------------|----------|
| Gene | Drop-off ( $r_b$ ) | Dropoff per codon ( $r_c$ ) | RMSE    | $R^2$  | SE     | CI               | Pvalue   |
| MHS2 | 0.0508             | 0.003                       | 0.4033  | 0.6418 | 0.0051 | $r_b \pm 0.0102$ | <0.00001 |
| MLH1 | 0.0354             | 0.0021                      | 11.5249 | 0.0196 | 0.0373 | $r_b \pm 0.0751$ | 0.1741   |
| D4   |                    |                             |         |        |        |                  |          |
| Gene | Drop-off ( $r_b$ ) | Dropoff per codon ( $r_c$ ) | RMSE    | $R^2$  | SE     | CI               | Pvalue   |
| MHS2 | 0.044              | 0.0026                      | 0.2331  | 0.6999 | 0.0039 | $r_b \pm 0.0077$ | <0.00001 |
| MLH1 | 0.047              | 0.0028                      | 0.6852  | 0.3727 | 0.0091 | $r_b \pm 0.0183$ | <0.00001 |

**Table S17.** Gene Length subset sizes. Column 1 is Gene Length subset. Column 2 is set size.

| Gene Length Subset | Set Size |
|--------------------|----------|
| ]0-500]            | 1573     |
| ]500-1000]         | 1547     |
| ]1000-2000]        | 2213     |
| ]2000-3000]        | 801      |
| ]3000-4000]        | 282      |
| ]4000-5000]        | 119      |
| >5000              | 77       |

### S3. SUPPLEMENTARY FIGURES

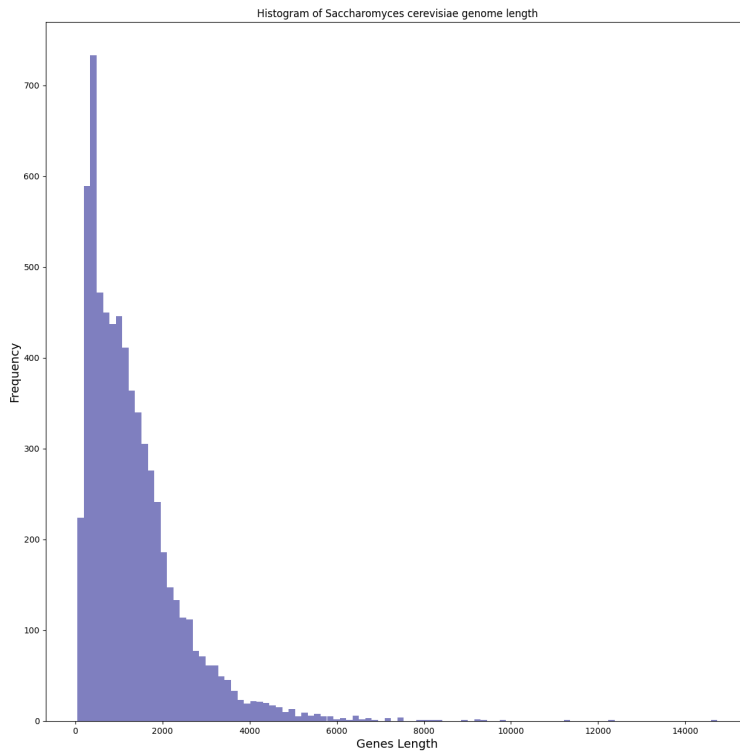

**Figure S1.** *Saccharomyces cerevisiae* Gene Length Distribution



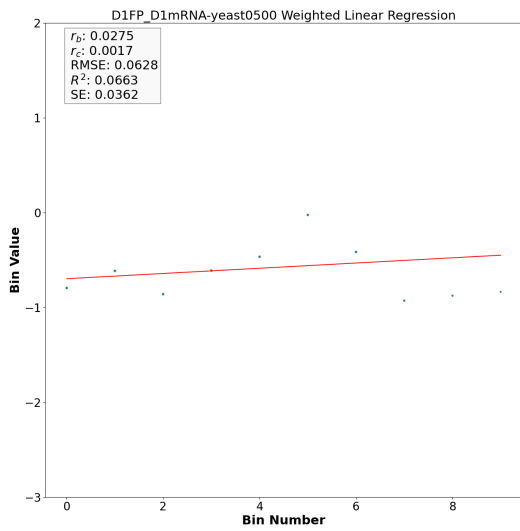

**Figure S2.** D1 (Synthetic Defined): Subset with Gene Length [0-500[

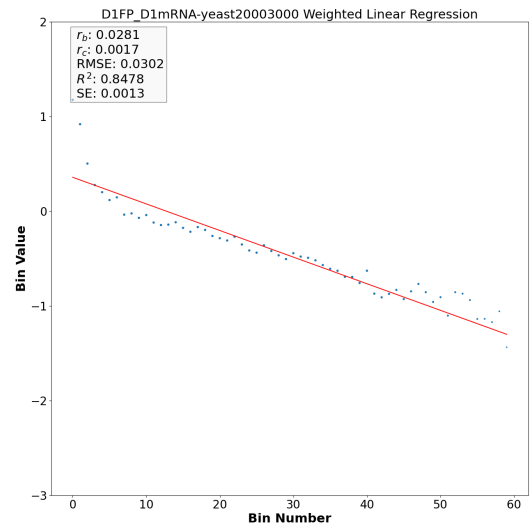

**Figure S3.** D1 (Synthetic Defined): Subset with Gene Length ]2000-3000]

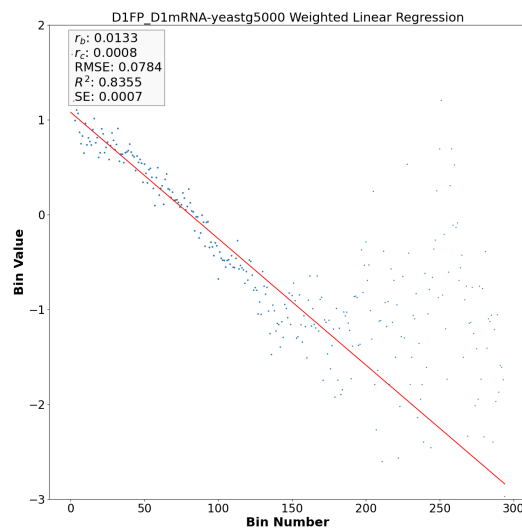

**Figure S4.** D1 (Synthetic Defined): Subset with Gene Length greater than 5000

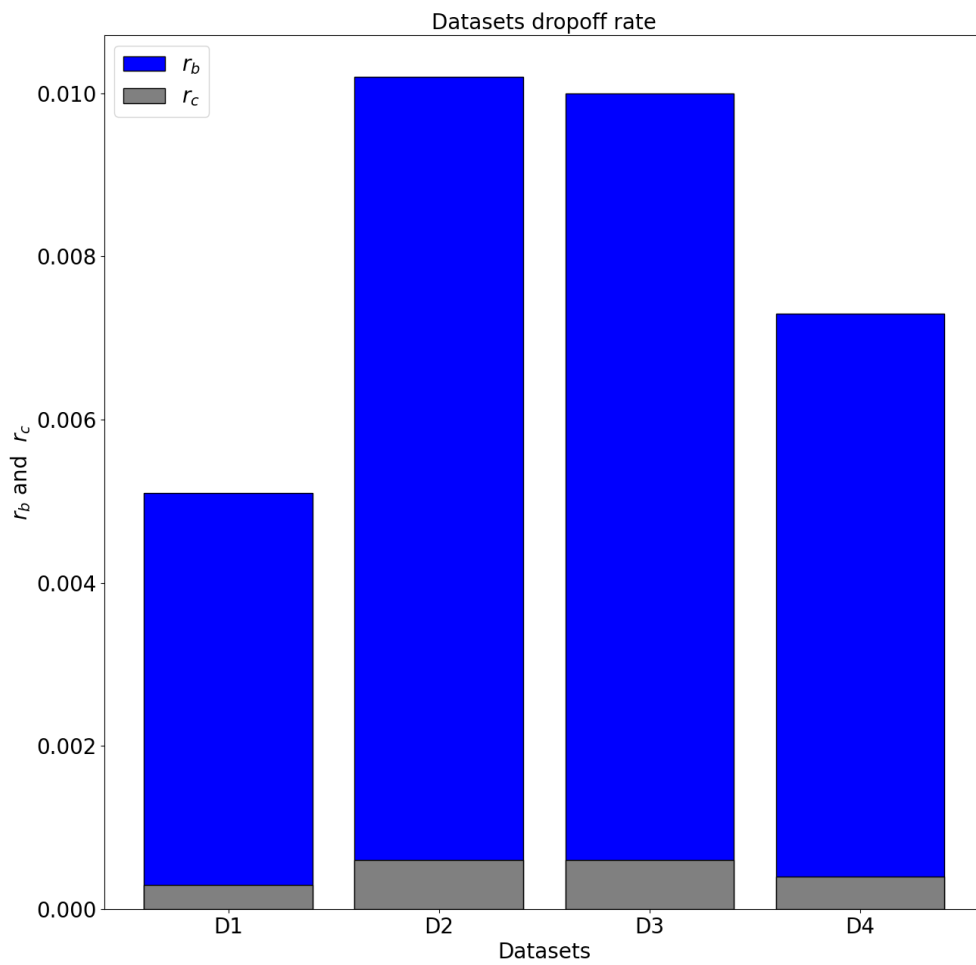

**Figure S5.** Dropoff rate per bin and Dropoff per codon for the four main Datasets

#### S4. A CASE STUDY: MSH2 AND MLH1 GENES

Ribofilio can be used to estimate the drop-off rate on a selected genes. Here, we used ribofilio to estimate the drop-off rate of genes MSH2 and MLH1 in yeast which are homologous to human gene MSH2 and MLH1 respectively (1, 6),(1, 6). MSH2 has been used to study Lynch syndrome, breast cancer, and ovarian cancer (2, 7). Yeast MLH1 has been used to study colorectal cancer (3, 5). We studied the drop-off rate of both MSH2 and MLH1 in both main datasets D1 and D2. Table S15 shows the drop-off rates of MSH2 and MLH1 in main datasets D1 and D2. Table S16 shows the drop-off rates of MSH2 and MLH1 in main datasets D3 and D4.

#### REFERENCES

1. J Michael Cherry, Caroline Adler, Catherine Ball, Stephen A Chervitz, Selina S Dwight, Erich T Hester, Yankai Jia, Gail Juvik, TaiYun Roe, Mark Schroeder, et al. Sgd: Saccharomyces genome database. *Nucleic acids research*, 26(1):73–79, 1998.
2. Mira Goldberg, Kathleen Bell, Melyssa Aronson, Kara Semotiuk, Greg Pond, Steven Gallinger, and Kevin Zbuk. Association between the lynch syndrome gene msh2 and breast cancer susceptibility in a canadian familial cancer registry. *Journal of Medical Genetics*, 54(11):742–746, 2017.
3. Sigurdis Haraldsdottir, Heather Hampel, Christina Wu, Daniel Y Weng, Peter G Shields, Wendy L Frankel, Xueliang Pan, Albert De La Chapelle, Richard M Goldberg, and Tanios Bekaii-Saab. Patients with colorectal cancer associated with lynch syndrome and mlh1 promoter hypermethylation have similar prognoses. *Genetics in medicine*, 18(9):863–868, 2016.
4. Michael Hilton, Jonathan Bell, and Darko Marinov. A large-scale study of test coverage evolution. In *Proceedings of the 33rd ACM/IEEE International Conference on Automated Software Engineering*, pages 53–63, 2018.
5. Tomoyuki Momma, Kenji Gonda, Yoshinori Akama, Eisei Endo, Daisuke Ujiie, Shotaro Fujita, Yuko Maejima, Shoichiro Horita, Kenju Shimomura, Shigehira Saji, et al. Mlh1 germline mutation associated with lynch syndrome in a family followed for more than 45 years. *BMC Medical Genetics*, 20(1):1–6, 2019.
6. Marek S Skrzypek and Jodi Hirschman. Using the saccharomyces genome database (sgd) for analysis of genomic information. *Current protocols in bioinformatics*, 35(1):1–20, 2011.
7. Aung Ko Win, Noralane M Lindor, and Mark A Jenkins. Risk of breast cancer in lynch syndrome: a systematic review. *Breast Cancer Research*, 15(2):1–9, 2013.
